# Supplementary material
Source: PubMed Central journal article supplement (PMC6356065)
Supplement: EMBJ-38-e99291-s001.pdf [file EMBJ-38-e99291-s001.pdf]

## Expanded View Figures

### Figure EV1. Microarray and clustering analysis of Immortomouse™ clonal preadipocyte cell lines.

- A pH measurement of confluent preadipocyte cell lines with different adipogenic differentiation potential. The cells were scored on a scale from 1 to 4 for adipogenic differentiation after Oil Red O staining (1: < 25%; 2: 25–50%; 3: 50–75%, and 4: 75–100% of cells differentiated). Data are shown as mean  $\pm$  SEM of 4–10 cell lines/group.
- B Clonal preadipocyte cell lines used for microarray analysis. Cells were scored on a scale from 1 to 4 for adipogenic differentiation after Oil Red O staining (1: < 25%; 2: 25–50%; 3: 50–75%, and 4: 75–100% of cells differentiated) and 1–4 for media acidification by media color based on scale in Fig 2B (1: pH < 6.5; 2: pH from 6.5 to 6.9; 3: pH from 7.0 to 7.6; 4: pH > 7.7). Cells were selected for differentiation scores of 2 or greater and variable media acidification rates.
- C Affinity propagation clustering of preadipocyte clonal cell line gene expression. Exemplars are representatives of their cluster.
- D Hierarchical clustering utilizing the average method of agglomeration of preadipocyte clonal cell line gene expression.
- E Principal component analysis of preadipocyte clonal cell line gene expression.
- F Bright-field image of clonal preadipocyte lines after *in vitro* adipogenic, osteogenic, and chondrogenic differentiation. Adipocytes, osteocytes, and chondrocytes were stained with Oil Red O, Alizarin Red, and Alcian Blue, respectively. Original photographs were at 10 $\times$  magnification (left panel). Scale bar = 100  $\mu$ m.

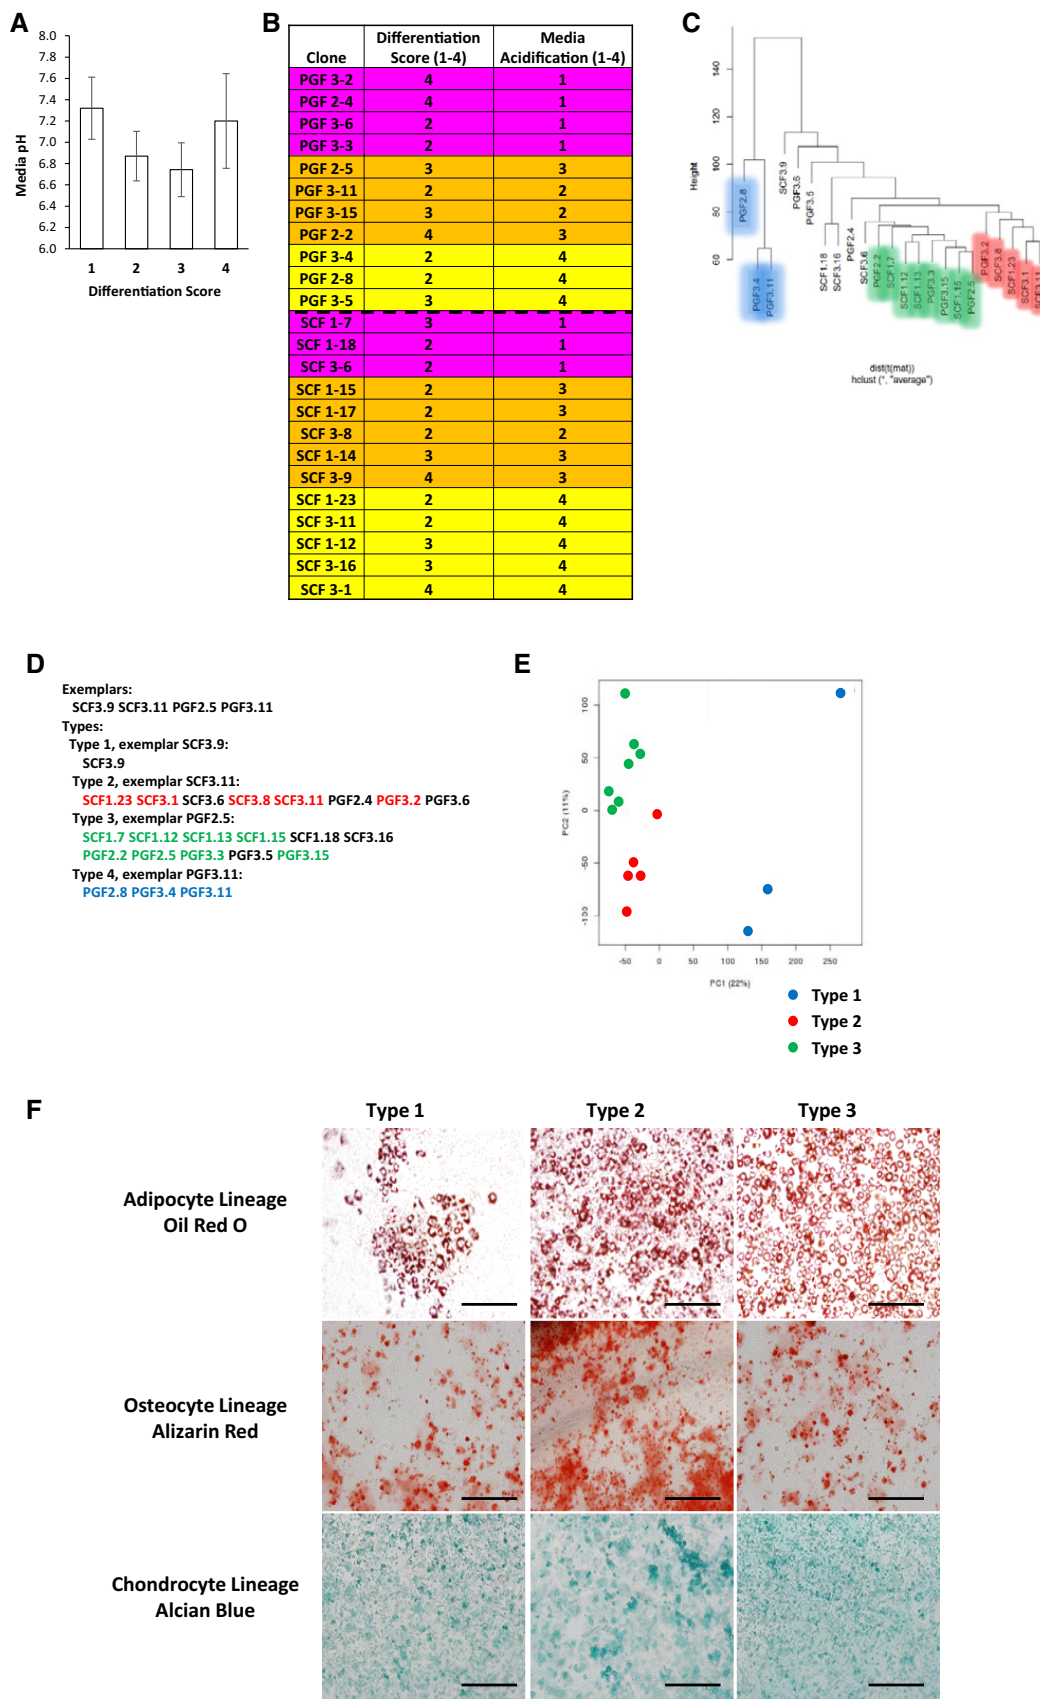

Figure EV1.

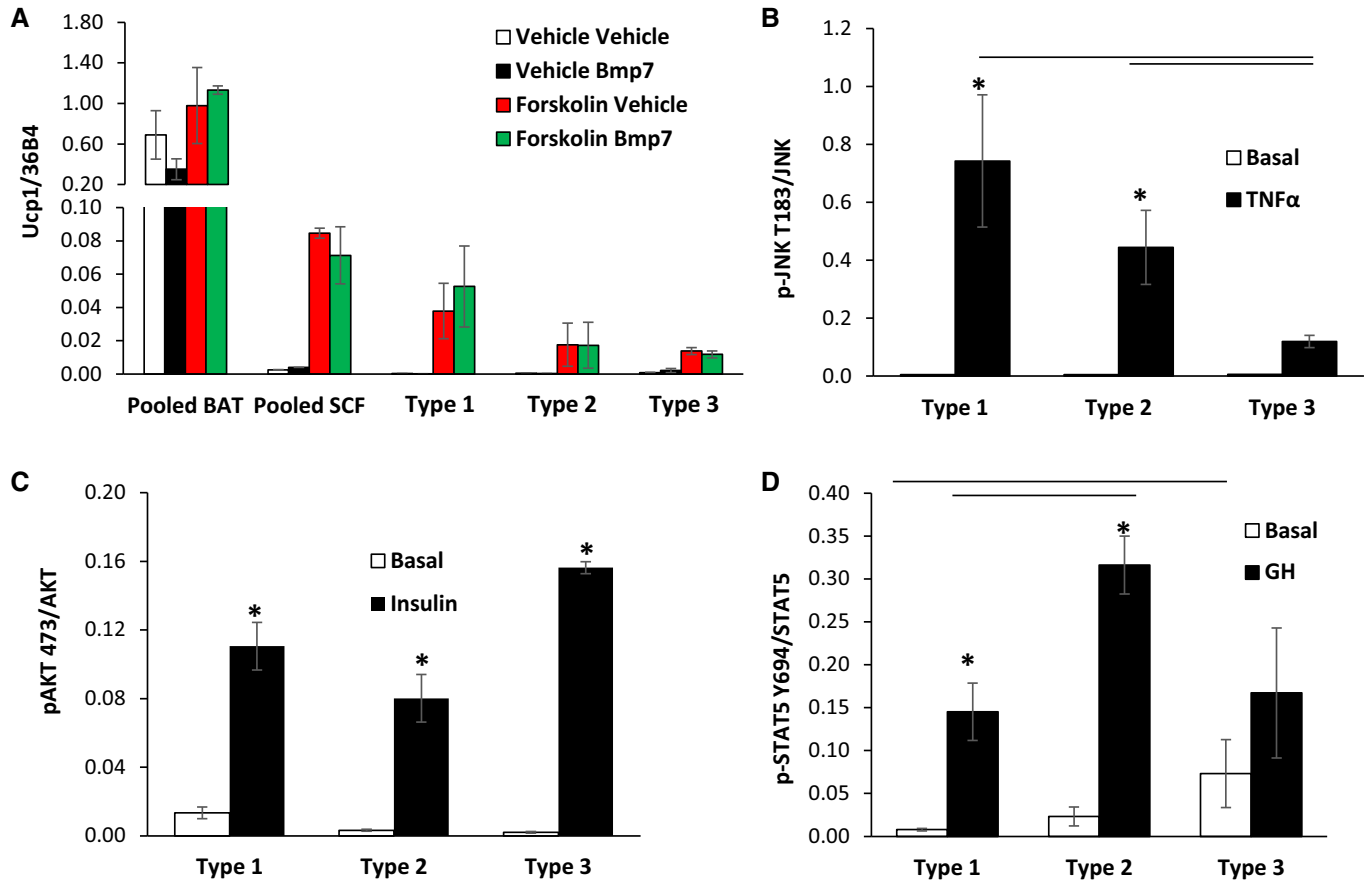

**Figure EV2. Measurement of *Ucp1* expression and quantitation of signaling in preadipocyte cell cultures in response to exogenous stimuli.**

**A** qPCR analysis for *Ucp1* in RNA isolated from Immortomouse adipocyte cell lines: pooled brown (BAT), pooled subcutaneous (SCF), Type 1, Type 2, and Type 3, after *in vitro* differentiation. Cells were treated  $\pm$  3.3 nM BMP7 for 3 days prior to differentiation or treated  $\pm$  10  $\mu$ M forskolin for 4 h. Data are shown as mean  $\pm$  SEM of 2–7 cell lines per group.

**B–D** Quantitation of Western blots depicted in Fig 4I. Data are shown as mean  $\pm$  SEM of three independent cell lines per group; each experiment was performed at least twice. Bars indicate significant differences between groups ( $P < 0.05$ ; two-way ANOVA) in all panels. Asterisks indicate significant differences between basal and treated samples ( $P < 0.05$ ; Student's *t*-test).

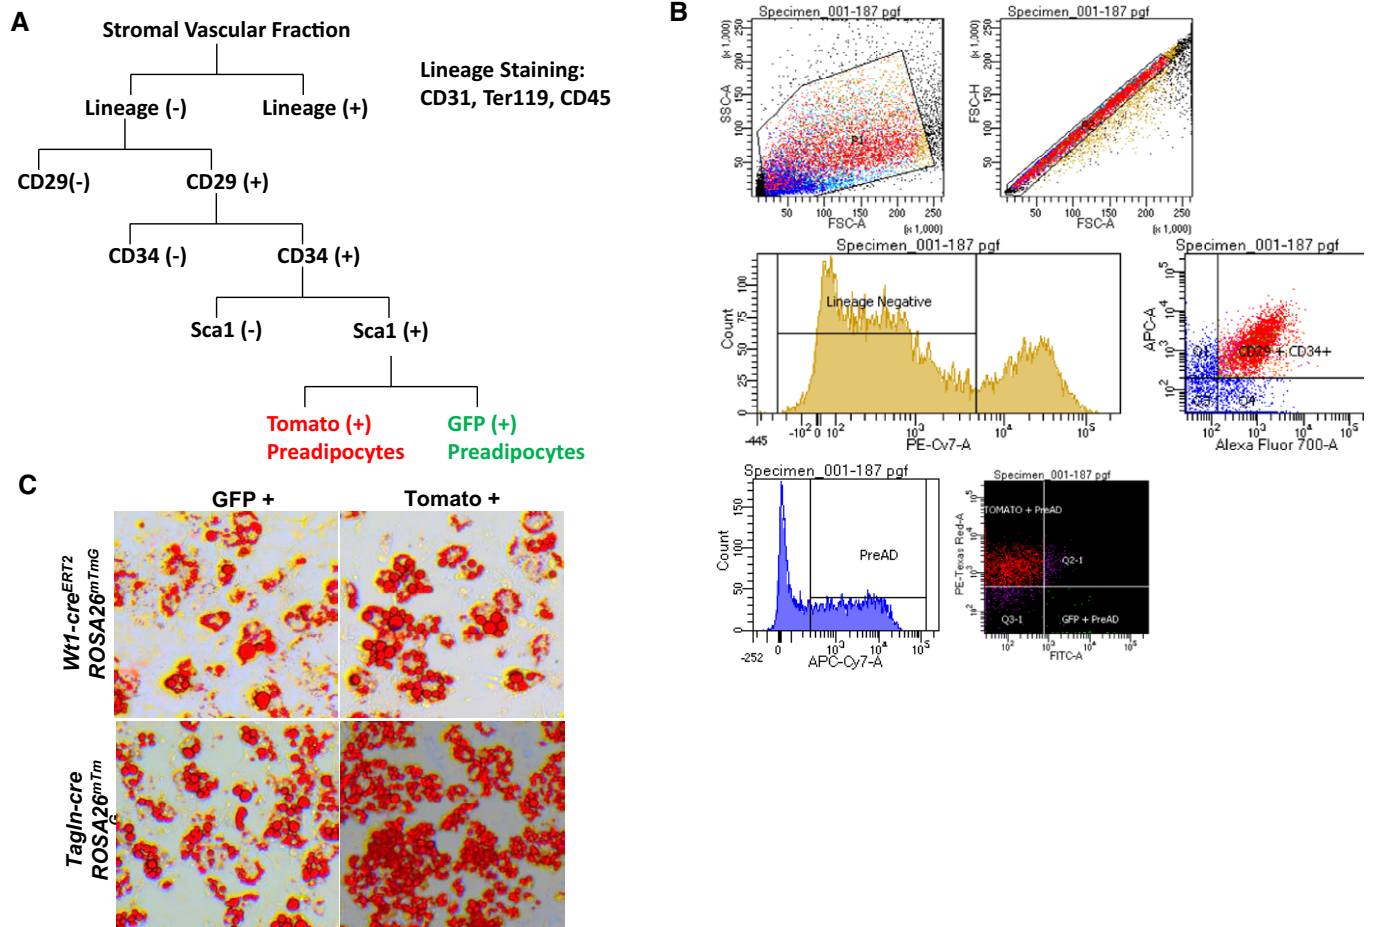

**Figure EV3. FACS Sorting and Adipogenic Differentiation of Rosa26<sup>mT/mG</sup> preadipocytes.**

A Schematic of FACS sorting for GFP- and Tomato-positive preadipocytes.

B Representative FACS plot of LacZ (+) APCs from the subcutaneous and perigonadal fat depots of Tbx15-LacZ male mice at 6–8 weeks of age.

C Bright-field image of primary mGFP- and mTomato-positive preadipocytes after *in vitro* adipogenic differentiation. Neutral lipids were stained with Oil Red O, and original photographs were at 10× magnification (left panel).

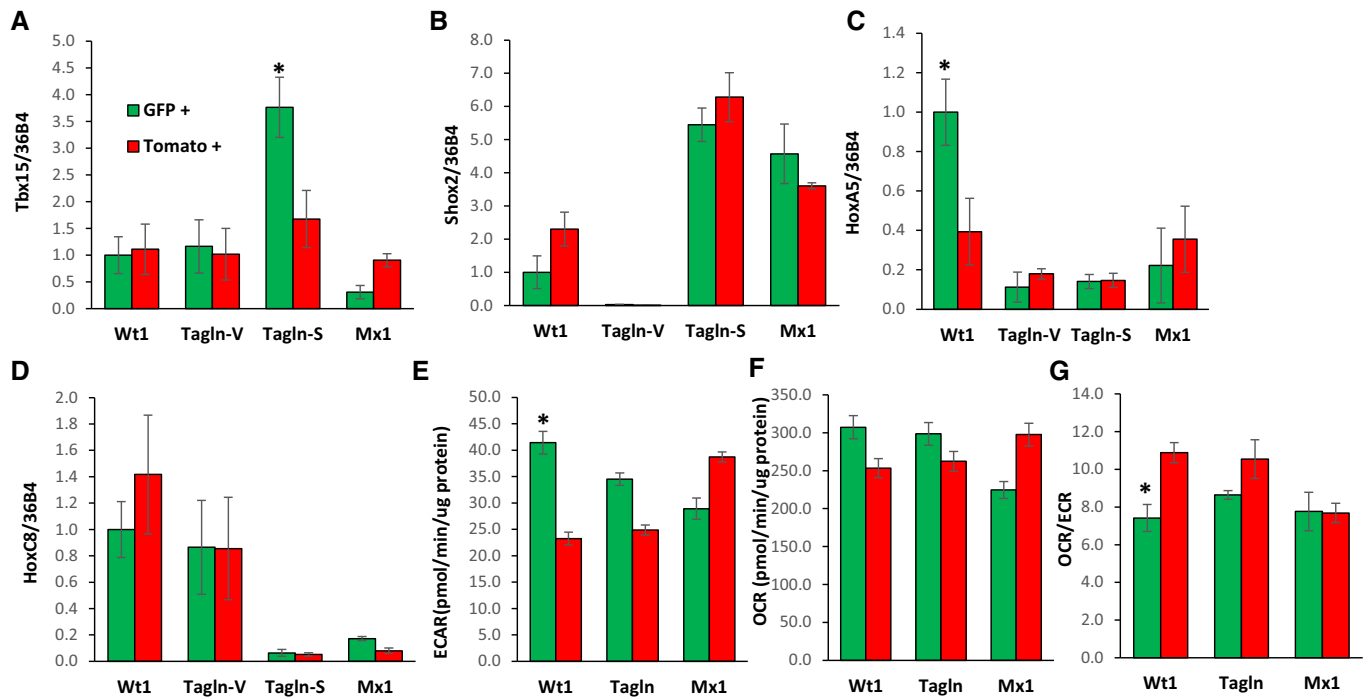

**Figure EV4. Gene expression and maximal metabolic rates of primary preadipocyte subpopulations.**

A–D Expression levels of *Shox2*, *Tbx15*, *HoxC8*, and *HoxC5* mRNA were compared using quantitative real-time PCR (qPCR) in primary preadipocytes isolated from white adipose tissue of 5- to 6-month-old Wt1-cre<sup>ERT2</sup>;Rosa26<sup>mT/mG</sup>, Tagln-cre;Rosa26<sup>mT/mG</sup>, and Mx1-cre;Rosa26<sup>mT/mG</sup> male mice. mGFP- and mTomato-positive preadipocytes were isolated from the pooled visceral fat depots (perigonadal, perirenal, mesenteric, and pericardial) of Wt1-cre<sup>ERT2</sup>;Rosa26<sup>mT/mG</sup> mice, the pooled subcutaneous fat depots (subcutaneous and scapular white) of Mx1-cre;Rosa26<sup>mT/mG</sup>, and both the pooled visceral (Tagln-V) and subcutaneous depots (Tagln-S) from Tagln-cre;Rosa26<sup>mT/mG</sup> mice. Data are shown as mean ± SEM of 4–6 mice/group.

E Maximal extracellular acidification rate (ECAR) of immortalized mGFP- and mTomato-positive preadipocytes was determined by calculating the area under the curve (AUC) during measurements of maximal extracellular acidification rate. The whole experiment was repeated twice. Data are shown as mean ± SEM of three cell lines per group.

F Maximal respiration of preadipocytes was of immortalized mGFP- and mTomato-positive preadipocytes determined by calculating the area under the curve (AUC) during measurements maximal of oxygen consumption rate (OCR). The whole experiment was repeated twice. Data are shown as mean ± SEM of three cell lines per group.

G Ratio of maximal oxygen consumption rate (OCR) to maximal extracellular acidification rate (ECAR) of immortalized mGFP- and mTomato-positive preadipocytes.

Data information: Asterisks indicate significant differences between mGFP- and corresponding mTomato-positive preadipocytes isolated from the same mouse line ( $P < 0.05$ ; paired two-way ANOVA) in all panels. Bars indicate significant differences between mGFP preadipocytes isolated from different mice lines ( $P < 0.05$ ; two-way ANOVA).

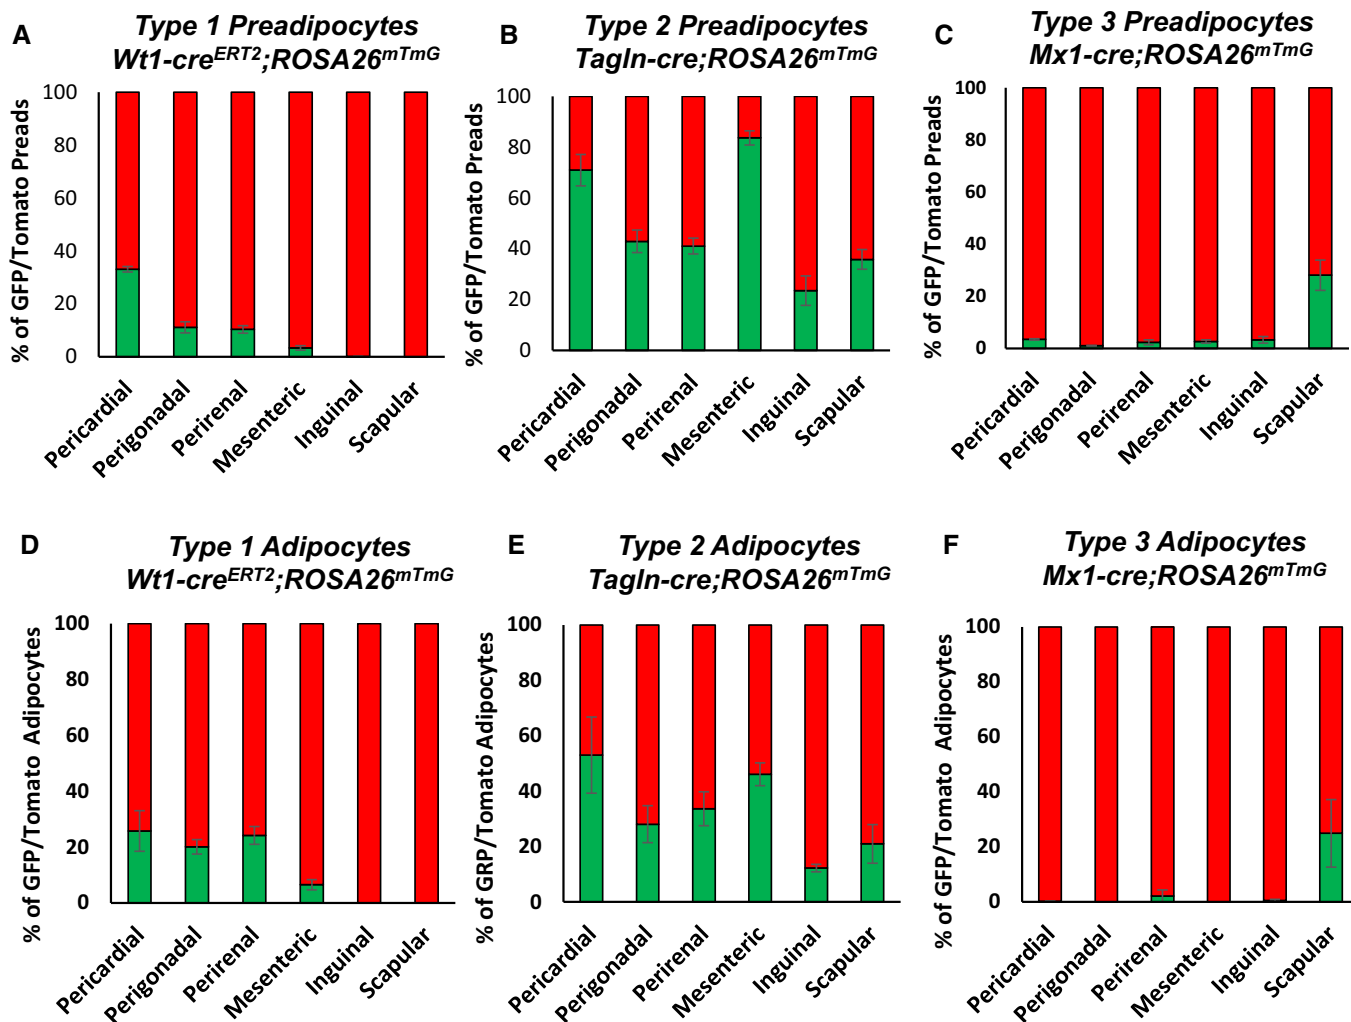

**Figure EV5. Preadipocytes and adipocyte subpopulations in female mice.**

A–C Number of mGFP- and mTomato-positive preadipocytes isolated by FACS from each of the indicated white adipose depots from 5- to 6-month-old female *Wt1-cre<sup>ERT2</sup>;Rosa26<sup>mT/mG</sup>*, *Tagln-cre;Rosa26<sup>mT/mG</sup>*, and *Mx1-cre;Rosa26<sup>mT/mG</sup>* mice. Data are shown as mean ± SEM of 4–9 mice.

D–F Quantitation of mGFP- and mTomato-positive adipocytes from each of the indicated white adipose depots from 5- to 6-month-old female *Wt1-cre<sup>ERT2</sup>;Rosa26<sup>mT/mG</sup>*, *Tagln-cre;Rosa26<sup>mT/mG</sup>*, and *Mx1-cre;Rosa26<sup>mT/mG</sup>* mice. Adipocytes were counted from four non-overlapping images/depot/mouse. Data are shown as mean ± SEM of 4–9 mice.
